# Supplementary material
Source: publisher site journal article supplement (https://www.dovepress.com/article/512359)
Supplement: Supplementary file 1 [file get_supplementary_file.php]

Supplementary table1. The weight values of candidate predictor variables in the prediction model

| Variables | Nomogram | | Decision tree | |
| --- | --- | --- | --- | --- |
| %IncMSE | IncNodePurity | %IncMSE | IncNodePurity |
| Radiomics score | 10.65 | 11.13 | 16.52 | 7.89 |
| HE4 | 9.48 | 8.87 | 12.36 | 8.06 |
| MYH10 | 19.66 | 31.65 | 12.26 | 21.36 |
| ARF3 | 9.04 | 8.59 | 10.23 | 9.12 |
